# Supplementary material for: Combining Functional and Structural Genomics to Sample the Essential Burkholderia Structome
Source: PLoS One. 2013 Jan 31;8(1):e53851. doi: 10.1371/journal.pone.0053851 (PMC3561365; doi:10.1371/journal.pone.0053851)
Supplement: Table S2 — Burkholderia protein structures (expanded version). (XLSX) [file pone.0053851.s002.xlsx]

## Sheet: Table S2
Table S2 - Burkholderia protein structures (expanded version)
Structures described in detail in the manuscript are indicated in bold.
* Best hit (if any) in a BLASTp search against the human proteome, using an E-value cutoff of 1x10-10 (UniProtKB AC)
# BURPS1710b_2511 (IspF) was screened using a fragment-based approach, yielding 17 PDB structures and 16 unique ligand-bound complexes:
3F0D, 3F0E, 3F0F, 3F0G, 3IEQ, 3IEW, 3MBM, 3P0Z, 3P10, 3Q8H, 3QHD, 3IKE, 3IKF, 3JVH, 3K14, 3K2X, 3KE1
Protein with structure(s) solved	Protein name	PDB ID(s)	Burkholderia species & strain	B. thailandensis putative essential gene	SSGCID Target ID	Human homolog*	% seq ID,* % coverage	Deep pocket	AA length	EC number	≥ 2 essential enzymes in pathway?	Pathway(s) (KEGG pathway ID)
BURPS1710b_0395	S-adenosylmethionine synthetase (metK)	3IML	B. pseudomallei 1710b	BTH_I0174	BupsA.00040.a	Q00266	58.7, 94.7	Yes	395	2.5.1.6	Y	Cysteine and methionine metabolism (bpm00270)
BTH_I0211	Ferredoxin-NADP reductase	4F7D, 4FK8	B. thailandensis E264	BTH_I0211	ButhA.00101.a	-	-	Yes	271		-	None listed
BTH_I0291	Dihydroneopterin aldolase	3V9O	B. thailandensis E264	BTH_I0291	ButhA.17925.a	-	-	Yes	139		Y	Folate biosynthesis (bte00790)
BTH_I0294	Uncharacterized ACR, COG1565 superfamily	4F3N, 4G67	B. thailandensis E264	BTH_I0294	ButhA.17973.a	Q7L592	26.6, 92.9	Yes	410		-	None listed
BURPS1710b_0748	Phosphopantetheine adenylyltransferase (coaD)	3K9W, 3PXU	B. pseudomallei 1710b	BTH_I0469	BupsA.00142.a	-	-	Yes	166	2.7.7.3	Y	Pantothenate and CoA biosynthesis (bpm00770)
BTH_I0472	Peptidyl-tRNA hydrolase (PTH)	3V2I	B. thailandensis E264	BTH_I0472	ButhA.17877.a	Q86Y79	36.4, 86.6	Yes	201	3.1.1.29	-	None listed
BURPS1710b_0753	Ribose-phosphate pyrophosphokinase (prsA)	3DAH	B. pseudomallei 1710b	BTH_I0474	BupsA.00035.a	P11908	47.5, 98.1	Yes	318	2.7.6.1	Y	Purine metabolism (bpm00230)
BTH_I0484	PTS IIA-like nitrogen-regulatory protein PtsN (ptsN)	3URR	B. thailandensis E264	BTH_I0484	ButhA.01071.a	-	-	Yes	151		Y	Phosphotransferase system (PTS) (bte02060)
BamMC406_2543	Phosphoribosylaminoimidazole carboxylase, ATPase subunit	4E4T	B. ambifaria MC40-6	BTH_I06682	BuamA.00036.a	-	-	Yes	398	4.1.1.21	Y	Purine metabolism (bac00230)
BTH_I0732	Ornithine carbamoyltransferase	4F2G	B. thailandensis E264	BTH_I0732	ButhA.00088.a	P00480	39.8, 96.1	Yes	309	2.1.3.3	-	None listed
BURPS1710b_1080	Adenylate kinase (adk)	3GMT	B. pseudomallei 1710b	BTH_I0739	BupsA.00064.a	P54819	48.5, 98.1	Yes	220	2.7.4.3	Y	Purine metabolism (bpm00230)
BURPS1710b_1108	Isocitrate dehydrogenase (icd)	3DMS	B. pseudomallei 1710b	BTH_I0759	BupsA.00092.a	P50213	31.4, 94.0	Yes	419	1.1.1.41	Y	Citrate cycle (TCA cycle) (bpm00020)
BTH_I0848	Pantothenate synthetase (panC)	3UK2	B. thailandensis E264	BTH_I0848	ButhA.00097.a	-	-	Yes	279	6.3.2.1	Y	Pantothenate and CoA biosynthesis (bte00770), beta-Alanine metabolism (bte00410)
BTH_I0860	Deoxycytidine triphosphate deaminase (dcd)	4DHK	B. thailandensis E264	BTH_I0860	ButhA.00973.a	-	-	No	189	3.5.4.13	Y	Pyrimidine metabolism (bte00240)
BURPS1710b_1237	Inorganic pyrophosphatase (ppa)	3D63, 3EIY, 3EIZ, 3EJ0, 3EJ2, 3GVF	B. pseudomallei 1710b	BTH_I0878	BupsA.00023.a	-	-	Yes	175	3.6.1.1	Y	Oxidative phosphorylation (bpm00190)
BTH_I0882	Glutamine dependent NAD+ synthetase (nadE)	4F4H	B. thailandensis E264	BTH_I0882	ButhA.18002.a	-	-	Yes	561	6.3.1.5	Y	Nicotinate and nicotinamide metabolism (bte00760)
BTH_I1058	Triosephosphate isomerase (tpiA)	4G1K	B. thailandensis E264	BTH_I1058	ButhA.00317.a	P60174	41.5, 99.2	Yes	251	5.3.1.1	Y	Glycolysis / Gluconeogenesis (bte00010)
BamMC406_0490	D-alanine--D-alanine ligase (ddl)	4EG0	B. ambifaria MC40-6	BTH_I1120	BuamA.00119.a	-	-	Yes	313	6.3.2.4	Y	D-Alanine metabolism (bac00473), Peptidoglycan biosynthesis (bac00550)
Bxe_A0488		4EGJ	B. xenovorans LB400		BuxeA.00119.a			Yes	313	6.3.2.4	Y	D-Alanine metabolism (bxe00473), Peptidoglycan biosynthesis (bxe00550)
BTH_I1195	Transketolase (tkt)	3UK1, 3UPT	B. thailandensis E264	BTH_I1195	ButhA.01294.a	Q53EM5	27.8, 95.8	Yes	690	2.2.1.1	Y	Pentose phosphate pathway (bte00030)
BTH_I1208	Dihydrodipicolinate reductase (dapB)	4F3Y	B. thailandensis E264	BTH_I1208	ButhA.00820.a	-	-	No	268	1.3.1.26	Y	Lysine biosynthesis (bte00300)
BTH_I1214	Gamma-glutamyl phosphate reductase (proA)	4GHK	B. thailandensis E264	BTH_I1214	Butha.01417.a	P54886	37.8, 96.2	Yes	423	1.2.1.41	Y	Arginine and proline metabolism (bte00330)
BTH_I1311	3-methyl-2-oxobutanoate hydroxymethyltransferase (panB)	3VAV	B. thailandensis E264	BTH_I1311	ButhA.00112.a	-	-	Yes	271	2.1.2.11	Y	Pantothenate and CoA biosynthesis (bte00770)
BTH_I1489	Phosphoglucomutase / phosphomannomutase family protein	3UW2	B. thailandensis E264	BTH_I1489	ButhA.01370.a	-	-	Yes	464		Y	Glycolysis / Gluconeogenesis (bte00010)
Bphy_0771	tRNA (guanine-N(1)-)-methyltransferase	4H3Z, 4H3Y	B. phymatum STM815	BTH_I1663	BuphaA.00054.a	O75588	84.6, 53.3	Yes	255	2.1.1.31	-	None listed
BTH_I1680	Thymidylate synthase (thyA)	3V8H	B. thailandensis E264	BTH_I1680	ButhA.01181.a	Q53Y97	34.6, 99.4	Yes	323	2.1.1.45	Y	Pyrimidine metabolism (bte00240)
BURPS1710b_0096		3GWA, 3GWE	B. pseudomallei 1710b		BupsA.00171.a	-	-	Yes	344		Y	Fatty acid biosynthesis (bpm00061)
Bxe_A0096	3-oxoacyl-(acyl-carrier protein) synthase	4EFI	B. xenovorans LB400	BTH_I1717	BuxeA.00171.a	-	-	Yes	354	2.3.1.41	Y	Fatty acid biosynthesis (bxe00061)
Bxe_A1072		4DFE	B. xenovorans LB400		BuxeA.00171.c	-	-	Yes	329	2.3.1.41	Y	Fatty acid biosynthesis (bxe00061)
BURPS1710b_2906	Acyl-carrier-protein S-malonyltransferase (fabD)	3EZO	B. pseudomallei 1710b	BTH_I1718	BupsA.00141.a	Q8IVS2	32.6, 91.3	Yes	310	2.3.1.39	Y	Fatty acid biosynthesis (bpm00061)
BURPS1710b_2905	3-ketoacyl-(acyl-carrier-protein) reductase (fabG)	3FTP	B. pseudomallei 1710b	BTH_I1719	BupsA.00010.a	Q92506	43.2, 99.6	Yes	249	1.1.1.100	Y	Fatty acid biosynthesis (bpm00061)
BURPS1710b_A1014	Acetoacetyl-CoA reductase (phbB-2)	3GK3	B. pseudomallei 1710b		BupsA.00010.g	Q92506	37.2, 97.6	Yes	248		Y	Glyoxylate and dicarboxylate metabolism (bpm00630)
Bcep1808_4002	3-oxoacyl-(acyl-carrier-protein) synthase II	4DDO, 4F32	B. vietnamiensis G4	BTH_I1721	BuviA.00113.b	Q9NWU1	45.6, 96.1	Yes	430	2.3.1.41	Y	Fatty acid biosynthesis (bvi00061)
Bphy_0703	Beta-ketoacyl synthase	4EWG	B. phymatum STM815	BTH_I1721	BuphA.00113.a	Q9NWU1	34.7, 98.8	Yes	408		Y	Fatty acid biosynthesis (bph00061)
BURPS1710b_2892	Pyridoxal phosphate biosynthetic protein (pdxJ)	3GK0	B. pseudomallei 1710b	BTH_I1733	BupsA.00131.a	-	-	Yes	257		Y	Vitamin B6 metabolism (bpm00750)
BTH_I1883	Lysyl-tRNA synthetase (lysS)	4EX5	B. thailandensis E264	BTH_I1883	ButhA.00612.a	Q15046	39.3, 97.8	Yes	508	6.1.1.6	Y	Aminoacyl-tRNA biosynthesis (bte00970)
BamMC406_2018		3T4C	B. ambifaria MC40-6		BuamA.00102.a	-	-	Yes	284		Y	Lipopolysaccharide biosynthesis (bac00540)
BCAL2180	2-dehydro-3-deoxyphosphooctonate aldolase (kdsA)	3TML	B. cenocepacia J2315	BTH_I1893	BuceA.00102.a	-	-	Yes	284		Y	Lipopolysaccharide biosynthesis (bcj00540)
BURPS1710b_3264		3SZ8, 3TMQ, 3UND	B. pseudomallei 1710b		BupsA.00102.a	-	-	Yes	281	2.5.1.55	Y	Lipopolysaccharide biosynthesis (bpm00540)
BURPS1710b_2636	Enoyl-(acyl carrier protein) reductase (fabI)	3EK2	B. pseudomallei 1710b	BTH_I1977	BupsA.00010.b	-	-	Yes	263	1.3.1.10	Y	Fatty acid biosynthesis (bpm00061)
BTH_I1984	Glutamyl-tRNA synthetase (gltX)	4G6Z	B. thailandensis E264	BTH_I1984	ButhA.01187.a	Q5JPH6	35.5, 67.0	Yes	469	6.1.1.17	Y	Aminoacyl-tRNA biosynthesis (bte00970)
BTH_I2038	(3R)-hydroxymyristoyl-[acyl-carrier-protein] dehydratase (fabZ)	4H4G	B. thailandensis E264	BTH_I2038	ButhA.17998.a	-	-	Yes	160	4.2.1.-	Y	Fatty acid biosynthesis (bte00061)
BTH_I2039	UDP-N-acetylglucosamine O-acyltransferase (lpxA)	4EQY	B. thailandensis E264	BTH_I2039	ButhA.00428.a	-	-	Yes	262	2.3.1.129	Y	Lipopolysaccharide biosynthesis (bte00540)
BamMC406_4587	Putative signal-transduction protein with CBS domains	4FRY	B. ambifaria MC40-6	BTH_I2056	BuamA.00062.b	-	-	Yes	153		-	None listed
BURPS1710b_2511#	2C-methyl-D-erythritol 2,4-cyclodiphosphate synthase (IspF)	17 structures#	B. pseudomallei 1710b	BTH_I2090	BupsA.00122.a	-	-	Yes	162	4.6.1.12	Y	Terpenoid backbone biosynthesis (bpm00900)
BTH_I2154	Thymidylate kinase (tmk)	3V9P	B. thailandensis E264	BTH_I2154	ButhA.01616.a	-	-	Yes	206	2.7.4.9	Y	Pyrimidine metabolism (bte00240)
BTH_I2199	Threonine synthase (thrC)	3V7N	B. thailandensis E264	BTH_I2199	ButhA.00545.a	Q8N9J5	32.6, 88.4	Yes	483	4.2.3.1	Y	Glycine, serine and threonine metabolism (bte00260), Vitamin B6 metabolism (bte00750)
BTH_I2231	Nucleoside diphosphate kinase (ndk)	4DUT, 4EK2	B. thailandensis E264	BTH_I2231	ButhA.00438.a	Q9NUF9	44.7, 93.6	Yes	141	2.7.4.6	Y	Purine metabolism (bte00230), Pyrimidine metabolism (bte00240)
BTH_I2235	Histidyl-tRNA synthetase (hisS)	4E51	B. thailandensis E264	BTH_I2235	ButhA.00063.a	-	-	Yes	446	6.1.1.21	Y	Aminoacyl-tRNA biosynthesis (bte00970)
BTH_I2245	Adenylosuccinate synthetase (purA)	3UE9	B. thailandensis E264	BTH_I2245	ButhA.00888.a	Q8N142	42.0, 96.9	Yes	448	6.3.4.4	Y	Purine metabolism (bte00230)
BTH_I2516	Ribose-5-phosphate isomerase A (rpiA)	3U7J, 3UW1	B. thailandensis E264	BTH_I2516	ButhA.00944.a	P49247	36.2, 95.3	Yes	235	5.3.1.6	Y	Pentose phosphate pathway (bte00030)
BTH_I3037	Probable GTP-binding protein engB	4DHE	B. thailandensis E264	BTH_I3037	ButhA.00252.a	Q8N3Z3	30.8, 71.7	Yes	219		-	None listed
BTH_I3304	Uroporphyrinogen decarboxylase (hemE)	4EXQ	B. thailandensis E264	BTH_I3304	ButhA.01152.a	P06132	48.5, 98.1	Yes	364	4.1.1.37	Y	Porphyrin and chlorophyll metabolism (bte00860)
BTH_II0675	Aspartate-semialdehyde dehydrogenase (asd)	3UW3	B. thailandensis E264	BTH_II0675	ButhA.17885.a	-	-	Yes	373	1.2.1.11	Y	Glycine, serine and threonine metabolism (bte00260)
BTH_II1941	Agmatinase, putative	4DZ4	B. thailandensis E264	BTH_II1941	ButhA.00719.a	Q9BSE5	42.5, 88.8	Yes	320	3.5.3.11	Y	Arginine and proline metabolism (bte00330)
BTH_II2229	Isochorismatase family protein	3TXY	B. thailandensis E264	BTH_II2229	ButhA.17871.a	-	-	Yes	195		-	None listed
