# Supplementary material for: Combining Functional and Structural Genomics to Sample the Essential Burkholderia Structome
Source: PLoS One. 2013 Jan 31;8(1):e53851. doi: 10.1371/journal.pone.0053851 (PMC3561365; doi:10.1371/journal.pone.0053851)
Supplement: Table S4 — Comparison of ortholog structures. (XLSX) [file pone.0053851.s004.xlsx]

## Sheet: Table S4
Table S4 - Comparison of ortholog structures
* Chain-to-chain RMSD over all common Ca atoms
Protein name	Ortholog 1	PDB 1	Ortholog 2	PDB 2	% seq ID	% coverage	RMSD* (Å)
2-dehydro-3-deoxyphosphooctonate aldolase	BamMC406_2018	3T4C	BuceA.00102.a	3TML	0.979	1	1.1
D-alanine--D-alanine ligase	BamMC406_0490	4EG0	Bxe_A0488	4EGJ	0.866	1	0.6
2-dehydro-3-deoxyphosphooctonate aldolase	BamMC406_2018	3T4C	BURPS1710b_3264	3SZ8	0.5	0.9437	2.1
2-dehydro-3-deoxyphosphooctonate aldolase	BuceA.00102.a	3TML	BURPS1710b_3264	3SZ8	0.496	0.9437	1.4
3-oxoacyl-[acyl-carrier-protein] synthase II	Bcep1808_4002	4DDO	Bphy_0703	4EWG	0.361	0.9902	1.9
3-oxoacyl-[acyl-carrier-protein] synthase III	Bxe_A0096	4EFI	BURPS1710b_0096	3GWE	0.38	0.91	1.8
3-oxoacyl-[acyl-carrier-protein] synthase III	Bxe_A1072	4DFE	BURPS1710b_0096	3GWE	0.295	0.9826	1.8
				Average	0.553857	0.967171	1.52857
				St. dev.	0.264214	0.0348668	0.52825
